RESEARCH

# Hydraulic resistance of perivascular spaces in the brain

Jeffrey Tithof<sup>1</sup>, Douglas H. Kelley<sup>1</sup>, Humberto Mestre<sup>2</sup>, Maiken Nedergaard<sup>2</sup> and John H. Thomas<sup>1</sup>

Correspondence:

j.tithof@rochester.edu

d.h.kelley@rochester.edu

humberto\_mestre@urmc.rochester.edu

maiken\_nedergaard@urmc.rochester.edu

thomas@me.rochester.edu

<sup>1</sup>Department of Mechanical

Engineering, University of

Rochester, Rochester, NY 14627,

USA

Full list of author information is

available at the end of the article

## Abstract

**Background:** Perivascular spaces (PVSs) are annular channels that surround blood vessels and carry cerebrospinal fluid through the brain, sweeping away metabolic waste. *In vivo* observations reveal that they are not concentric, circular annuli, however: the outer boundaries are often oblate, and the blood vessels that form the inner boundaries are often offset from the central axis.

**Methods:** We model PVS cross-sections as circles surrounded by ellipses and vary the radii of the circles, major and minor axes of the ellipses, and two-dimensional eccentricities of the circles with respect to the ellipses. For each shape, we solve the governing Navier-Stokes equation to determine the velocity profile for steady laminar flow and then compute the corresponding hydraulic resistance.

**Results:** We find that the observed shapes of PVSs have lower hydraulic resistance than concentric, circular annuli of the same size, and therefore allow faster, more efficient flow of cerebrospinal fluid. We find that the minimum hydraulic resistance (and therefore maximum flow rate) for a given PVS cross-sectional area occurs when the ellipse is elongated and intersects the circle, dividing the PVS into two lobes, as is common around pial arteries. We also find that if both the inner and outer boundaries are nearly circular, the minimum hydraulic resistance occurs when the eccentricity is large, as is common around penetrating arteries.

**Conclusions:** The concentric circular annulus assumed in recent studies is not a good model of the shape of actual PVSs observed *in vivo*, and it greatly overestimates the hydraulic resistance of the PVS. Our parameterization can be used to incorporate more realistic resistances into hydraulic network models of flow of cerebrospinal fluid in the brain. Our results demonstrate that actual shapes observed *in vivo* are nearly optimal, in the sense of offering the least hydraulic resistance. This optimization may well represent an evolutionary adaptation that maximizes clearance of metabolic waste from the brain.

**Keywords:** Perivascular flow; Cerebrospinal fluid; Bulk flow; Hydraulic resistance; Fluid mechanics; Glymphatic system

1

2

## 3 Background

4 It has long been thought that flow of cerebrospinal fluid (CSF) in perivascular  
5 spaces plays an important role in the clearance of solutes from the brain [1, 2,

6 3]. Experiments have shown that tracers injected into the subarachnoid space are  
7 transported preferentially into the brain through periarterial spaces at rates much  
8 faster than can be explained by diffusion alone [4, 5, 6]. Recent experimental results  
9 [7, 8] now show unequivocally that there is pulsatile flow in the perivascular spaces  
10 around pial arteries in the mouse brain, with net (bulk) flow in the same direction  
11 as the blood flow. These *in vivo* measurements support the hypothesis that this flow  
12 is driven primarily by “perivascular pumping” due to motions of the arterial wall  
13 synchronized with the cardiac cycle [8]. From the continuity equation (expressing  
14 conservation of mass), we know that this net flow must continue in some form  
15 through other parts of the system (e.g., along PVSs around penetrating arteries,  
16 arterioles, capillaries, venules). The *in vivo* experimental methods of Mestre *et al.*  
17 [8] now enable measurements of the size and shape of the perivascular spaces, the  
18 motions of the arterial wall, and the flow velocity field in great detail.

19 With these *in vivo* measurements, direct simulations can in principle predict the  
20 observed fluid flow by solving the Navier-Stokes (momentum) equation. A handful  
21 of numerical [9, 10, 11, 12, 13] and analytical [14, 15] studies have previously been  
22 developed to model CSF flow through PVSs. These studies provide important steps  
23 in understanding the fluid dynamics of the entire glymphatic system [3, 16], not  
24 only in mice but in mammals generally. However, these studies have been based  
25 on idealized assumptions and have typically simulated fluid transport through only  
26 a small portion of the brain. Development of a fully-resolved fluid-dynamic model  
27 that captures CSF transport through the entire brain is beyond current capabilities  
28 for two reasons: (i) the very large computational cost of such a simulation, and (ii)  
29 the lack of detailed knowledge of the configuration and mechanical properties of the  
30 various flow channels throughout the glymphatic pathway, especially deep within  
31 the brain. We note that these limitations and the modest number of publications  
32 modeling CSF transport through the brain are in contrast with the much more  
33 extensive body of research modeling CSF flow in the spinal canal, which has pursued  
34 modeling based on idealized [17, 18, 19], patient-specific [20, 21], and *in vitro* [22]  
35 geometries (see the recent review articles [23, 24, 25]).

36 To simulate CSF transport at a brain-wide scale, a tractable first step is to model  
37 the flow using a hydraulic network by estimating the hydraulic resistance of the  
38 channels that carry the CSF, starting with the PVSs. This article is restricted to

39 modeling of CSF flow through PVSs in the brain and does not address the question  
40 of flow through the brain parenchyma [26, 27], a region where bulk flow phenomena  
41 have not been characterized in the same detail as in the PVS. A steady laminar  
42 (Poiseuille) flow of fluid down a channel is characterized by a volume flow rate  $\bar{Q}$   
43 that is proportional to the pressure drop  $\Delta p$  along the channel. The inverse of that  
44 proportionality constant is the hydraulic resistance  $\bar{\mathcal{R}}$ . Higher hydraulic resistance  
45 impedes flow, such that fewer mL of CSF are pumped per second by a given pressure  
46 drop  $\Delta p$ ; lower hydraulic resistance promotes flow. Hydraulic resistance is analogous  
47 to electrical resistance, which impedes the electrical current driven by a given volt-  
48 age drop. The hydraulic resistance of a channel for laminar flow can be calculated  
49 from the viscosity of the fluid and the length, shape, and cross-sectional area of the  
50 channel. We note that prior numerical studies have computed the hydraulic resis-  
51 tance of CSF flow in the spinal canal [28, 29], and a few hydraulic-network models  
52 of perivascular flows have been presented, using a concentric circular-annulus con-  
53 figuration of the PVS cross-section (e.g., [12, 30, 31]). As we demonstrate below,  
54 the concentric circular annulus is generally not a good model of the cross-section of  
55 a PVS. Here we propose a simple but more realistic model that is adjustable and  
56 able to approximate the cross-sections of PVSs actually observed in the brain. We  
57 then calculate the velocity profile, volume flow rate, and hydraulic resistance for  
58 Poiseuille flow with these cross-sections and demonstrate that the shapes of PVSs  
59 around pial arteries are nearly optimal.

## 60 **Methods**

### 61 **The basic geometric model of the PVS**

62 In order to estimate the hydraulic resistance of PVSs, we need to know the various  
63 sizes and shapes of these spaces *in vivo*. Recent measurements of periarterial flows in  
64 the mouse brain by Mestre *et al.* [8] show that the perivascular space (PVS) around  
65 the pial arteries is much larger than previously estimated—comparable to the di-  
66 ameter of the artery itself. *In vivo* experiments using fluorescent dyes show similar  
67 results [32]. The size of the PVS is substantially larger than that shown in previous  
68 electron microscope measurements of fixed tissue. Mestre *et al.* demonstrate that  
69 the PVS collapses during fixation: they find that the ratio of the cross-sectional

70 area of the PVS to that of the artery itself is on average about 1.4 *in vivo*, whereas  
71 after fixation this ratio is only about 0.14.

72 The *in vivo* observation of the large size of the PVS around pial arteries is im-  
73 portant for hydraulic models because the hydraulic resistance depends strongly on  
74 the size of the channel cross-section. For a concentric circular annulus of inner and  
75 outer radii  $r_1$  and  $r_2$ , respectively, for fixed  $r_1$  the hydraulic resistance scales roughly  
76 as  $(r_2/r_1)^{-4}$ , and hence is greatly reduced in a wider annulus. As we demonstrate  
77 below, accounting for the actual shapes and eccentricities of the PVSs will further  
78 reduce the resistance of hydraulic models.

79 Figure 1 shows images of several different cross-sections of arteries and surround-  
80 ing PVSs in the brain, measured *in vivo* using fluorescent dyes [8, 6, 32, 33] or  
81 optical coherence tomography [7]. The PVS around a pial artery generally forms an  
82 annular region, elongated in the direction along the skull. For an artery that pen-  
83 etrates into the parenchyma, the PVS is less elongated, assuming a more circular  
84 shape, but not necessarily concentric with the artery. Note that similar geometric  
85 models have been used to model CSF flow in the cavity (ellipse) around the spinal  
86 cord (circle) [17, 18].

87 We need a simple working model of the configuration of a PVS that is adjustable  
88 so that it can be fit to the various shapes that are actually observed, or at least  
89 assumed. Here we propose the model shown in Figure 2. This model consists of  
90 an annular channel whose cross-section is bounded by an inner circle, representing  
91 the outer wall of the artery, and an outer ellipse, representing the outer wall of the  
92 PVS. The radius  $r_1$  of the circular artery and the semi-major axis  $r_2$  ( $x$ -direction)  
93 and semi-minor axis  $r_3$  ( $y$ -direction) of the ellipse can be varied to produce different  
94 cross-sectional shapes of the PVS. With  $r_2 = r_3 > r_1$ , we have a circular annulus.  
95 Generally, for a pial artery, we have  $r_2 > r_3 \approx r_1$ : the PVS is annular but elongated  
96 in the direction along the skull. For  $r_3 = r_1 < r_2$ , the ellipse is tangent to the circle  
97 at the top and bottom, and for  $r_3 \leq r_1 < r_2$  the PVS is split into two disconnected  
98 regions, one on either side of the artery, a configuration that we often observe for a  
99 pial artery in our experiments. We also allow for eccentricity in this model, allowing  
100 the circle and ellipse to be non-concentric, as shown in Figure 2B. The center of the  
101 ellipse is displaced from the center of the circle by distances  $c$  and  $d$  in the  $x$  and  
102  $y$  directions, respectively. The model is thus able to match quite well the various

103 observed shapes of PVSs. To illustrate this, in Figure 1 we have drawn the inner  
104 and outer boundaries (thin and thick white curves, respectively) of the geometric  
105 model that gives a close fit to the actual configuration of the PVS. Specifically, the  
106 circles and ellipses plotted have the same centroids and the same normalized second  
107 central moments as the dyed regions in the images. We have drawn the full ellipse  
108 indicating the outer boundary of the PVS to clearly indicate the fit, but the portion  
109 which passes through the artery is plotted with a dotted line to indicate that this  
110 does not represent an anatomical structure.

### 111 **Steady laminar flow in the annular tube**

112 We wish to find the velocity distribution for steady, fully developed, laminar viscous  
113 flow in our model tube, driven by a uniform pressure gradient in the axial ( $z$ )  
114 direction. The velocity  $u(x, y)$  is purely in the  $z$ -direction and the nonlinear term in  
115 the Navier-Stokes equation is identically zero. The basic partial differential equation  
116 to be solved is the  $z$ -component of the Navier-Stokes equation, which reduces to

$$117 \quad \frac{\partial^2 u}{\partial x^2} + \frac{\partial^2 u}{\partial y^2} = \frac{1}{\mu} \frac{dp}{dz} \equiv -C = \text{constant}, \quad (1)$$

118 where  $\mu$  is the dynamic viscosity of the CSF. (Note that the pressure gradient  $dp/dz$   
119 is constant and negative, so the constant  $C$  we have defined here is positive.) If we  
120 introduce the nondimensional variables

$$121 \quad \xi = \frac{x}{r_1}, \quad \eta = \frac{y}{r_1}, \quad U = \frac{u}{Cr_1^2}, \quad (2)$$

122 then equation (1) becomes the nondimensional Poisson's equation

$$123 \quad \frac{\partial^2 U}{\partial \xi^2} + \frac{\partial^2 U}{\partial \eta^2} = -1. \quad (3)$$

124 We want to solve this equation subject to the Dirichlet (no-slip) condition  $U = 0$   
125 on the inner (circle) and outer (ellipse) boundaries. Analytic solutions are known  
126 for simple geometries, and we can calculate numerical solutions for a wide variety  
127 of geometries, as described below.

128 Let  $A_{pvs}$  and  $A_{art}$  denote the cross-sectional areas of the PVS and the artery,  
129 respectively. Now, define the nondimensional parameters

$$130 \quad \alpha = \frac{r_2}{r_1}, \quad \beta = \frac{r_3}{r_1}, \quad K = \frac{A_{pvs}}{A_{art}}. \quad (4)$$

131 (Note that  $K$  is also equal to the volume ratio  $V_{pvs}/V_{art}$  of a fixed length of our  
 132 tube model.) When  $r_1$ ,  $r_2$ ,  $r_3$ ,  $c$ , and  $d$  have values such that the ellipse surrounds  
 133 the circle without intersecting it, the cross-sectional areas of the PVS and the artery  
 134 are given simply by

$$135 \quad A_{pvs} = \pi(r_2 r_3 - r_1^2) = \pi r_1^2 (\alpha\beta - 1), \quad A_{art} = \pi r_1^2, \quad (5)$$

136 and the area ratio is

$$137 \quad K = \frac{A_{pvs}}{A_{art}} = \alpha\beta - 1. \quad (6)$$

138 In cases where the ellipse intersects the circle, the determination of  $A_{pvs}$  is more  
 139 complicated: in this case, equations (5) and (6) are no longer valid, and instead we  
 140 compute  $A_{pvs}$  numerically, as described in more detail below.

141 For our computations of velocity profiles in cases with no eccentricity ( $c = d = 0$ ),  
 142 we can choose a value of the area ratio  $K$ , which fixes the volume of fluid in the  
 143 PVS, and then vary  $\alpha$  to change the shape of the ellipse. Thus we generate a two-  
 144 parameter family of solutions: the value of  $\beta$  is fixed by the values of  $K$  and  $\alpha$ . In  
 145 cases where the circle does not protrude past the boundary of the ellipse, the third  
 146 parameter  $\beta$  varies according to  $\beta = (K + 1)/\alpha$ . For  $\alpha = 1$  the ellipse and circle are  
 147 tangent at  $x = \pm r_2$ ,  $y = 0$  and for  $\alpha = K + 1$  they are tangent at  $x = 0$ ,  $y = \pm r_3$ .  
 148 Hence, for fixed  $K$ , the circle does not protrude beyond the ellipse for  $\alpha$  in the range  
 149  $1 \leq \alpha \leq K + 1$ . For values of  $\alpha$  outside this range, we have a two-lobed PVS, and  
 150 the relationship among  $K$ ,  $\alpha$ , and  $\beta$  is more complicated.

151 The dimensional volume flow rate  $\bar{Q}$  is found by integrating the velocity-profile

$$152 \quad \bar{Q} = \int_{A_{pvs}} u(x, y) dx dy = Cr_1^4 \int_{A_{pvs}} U(\xi, \eta) d\xi d\eta \equiv Cr_1^4 Q, \quad (7)$$

153 where  $Q = \bar{Q}/Cr_1^4$  is the dimensionless volume flow rate. The hydraulic resistance  
 154  $\bar{\mathcal{R}}$  is given by the relation  $\bar{Q} = \Delta p / \bar{\mathcal{R}}$ , where  $\Delta p = (-dp/dz)L$  is the pressure drop  
 155 over a length  $L$  of the tube. For our purposes, it is better to define a hydraulic  
 156 resistance *per unit length*,  $\mathcal{R} = \bar{\mathcal{R}}/L$ , such that

$$157 \quad \bar{Q} = \frac{(-dp/dz)}{\mathcal{R}}, \quad \mathcal{R} = \frac{(-dp/dz)}{\bar{Q}} = \frac{\mu C}{\bar{Q}}. \quad (8)$$

158 We can use computed values of  $Q$  to obtain values of the hydraulic resistance  $\mathcal{R}$ .

159 From equations (7) and (8), we have

$$160 \quad \mathcal{R} = \frac{\mu C}{Q} = \frac{\mu C}{Cr_1^4 Q} = \frac{\mu}{r_1^4 Q}. \quad (9)$$

161 We can then plot the scaled, dimensionless resistance  $r_1^4 \mathcal{R} / \mu = 1/Q$  as a function  
162 of  $(\alpha - \beta)/K$  (shape of the ellipse) for different values of  $K$  (area ratio).

163 For viscous flows in ducts of various cross-sections, the hydraulic resistance is  
164 often scaled using the *hydraulic radius*  $r_h = 2A/P$ , where  $A$  is the cross-sectional  
165 area of the duct and  $P$  is the wetted perimeter. In the case of our annular model,  
166 however, the hydraulic radius  $r_h = 2A_{pvs}/P$  is not a useful quantity: when the  
167 inner circle lies entirely within the outer ellipse, both  $A_{pvs}$  and  $P$ , and hence  $r_h$ ,  
168 are independent of the eccentricity, but (as shown below) the hydraulic resistance  
169 varies with eccentricity.

## 170 Numerical methods

171 In order to solve Poisson's equation (3) subject to the Dirichlet condition  $U = 0$   
172 on the inner and outer boundaries of the PVS, we employ the Partial Differen-  
173 tial Equation (PDE) Toolbox in MATLAB. This PDE solver utilizes finite-element  
174 methods and can solve Poisson's equation in only a few steps. First, the geome-  
175 try is constructed by specifying a circle and an ellipse (the ellipse is approximated  
176 using a polygon with a high number of vertices, typically 100). Eccentricity may  
177 be included by shifting the centers of the circle and ellipse relative to each other.  
178 We specify that the equation is to be solved in the PVS domain corresponding  
179 to the part of the ellipse that does not overlap with the circle. We next specify  
180 the Dirichlet boundary condition  $U = 0$  along the boundary of the PVS domain  
181 and the coefficients that define the nondimensional Poisson's equation (3). Finally,  
182 we generate a fine mesh throughout the PVS domain, with a maximum element  
183 size of 0.02 (nondimensionalized by  $r_1$ ), and MATLAB computes the solution to  
184 equation (3) at each mesh point. The volume flow rate is obtained by numerically  
185 integrating the velocity profile over the domain. Choosing the maximum element  
186 size of 0.02 ensures that the numerical results are converged. Specifically, we com-  
187 pare the numerically obtained value of the flow rate  $Q$  for a circular annulus to the

188 analytical values given by equation (11) or equation (12) below to ensure that the  
189 numerical results are accurate to within 1%.

190 For the case where the circle protrudes beyond the boundary of the ellipse, equa-  
191 tions (5) and (6) do not apply. We check for this case numerically by testing whether  
192 any points defining the boundary of the circle extrude beyond the boundary of the  
193 ellipse. If so, we compute the area ratio  $K$  numerically by integrating the area of the  
194 finite elements in the PVS domain ( $A_{art}$  is known but  $A_{pvs}$  is not). In cases where  
195 we want to fix  $K$  and vary the shape of the ellipse (e.g. Fig. 5A), it is necessary to  
196 change the shape of the ellipse iteratively until  $K$  converges to the desired value.  
197 We do so by choosing  $\alpha$  and varying  $\beta$  until  $K$  converges to its desired value within  
198 0.01%.

### 199 Analytical solutions

200 There are two special cases for which there are explicit analytical solutions, and we  
201 can use these solutions as checks on the numerical method.

202 **The concentric circular annulus.** For a concentric circular annulus we have  
203  $c = d = 0$ ,  $r_2 = r_3 > r_1$ ,  $\alpha = \beta > 1$ , and  $K = \alpha^2 - 1$ . Let  $r$  be the radial  
204 coordinate, and  $\rho = r/r_1$  be the corresponding dimensionless radial coordinate. The  
205 dimensionless velocity profile is axisymmetric, and is given by White [34], p. 114:

$$206 \quad U(\rho) = \frac{1}{4} \left[ (\alpha^2 - \rho^2) - (\alpha^2 - 1) \frac{\ln(\alpha/\rho)}{\ln(\alpha)} \right], \quad 1 < \rho < \alpha, \quad (10)$$

207 and the corresponding dimensionless volume flux rate is given by:

$$208 \quad Q = \frac{\pi}{8} \left[ (\alpha^4 - 1) - \frac{(\alpha^2 - 1)^2}{\ln(\alpha)} \right] = \frac{\pi}{8} \left[ (K + 1)^2 - 1 - \frac{2K^2}{\ln(K + 1)} \right]. \quad (11)$$

209 **The eccentric circular annulus.** There is also an analytical solution for the  
210 case of an eccentric circular annulus, in which the centers of the two circles do not  
211 coincide [34, 35]. Let  $c$  denote the radial distance between the two centers. Then,  
212 in cases where the two circles do not intersect, the dimensionless volume flow rate  
213 is given by White [34], p. 114:

$$214 \quad Q = \frac{\pi}{8} \left[ (\alpha^4 - 1) - \frac{4\epsilon^2 \mathcal{M}^2}{(B - A)} - 8\epsilon^2 \mathcal{M}^2 \sum_{n=1}^{\infty} \frac{n \exp(-n[B + A])}{\sinh(n[B - A])} \right], \quad (12)$$



215 where  $\epsilon = c/r_1$  is the dimensionless eccentricity and

$$\begin{aligned} 216 \quad \mathcal{M} &= (\mathcal{F}^2 - \alpha^2)^{1/2}, \quad \mathcal{F} = \frac{\alpha^2 - 1 + \epsilon^2}{2\epsilon}, \\ 217 \quad A &= \frac{1}{2} \ln \left( \frac{\mathcal{F} + \mathcal{M}}{\mathcal{F} - \mathcal{M}} \right), \quad B = \frac{1}{2} \ln \left( \frac{\mathcal{F} - \epsilon + \mathcal{M}}{\mathcal{F} - \epsilon - \mathcal{M}} \right). \end{aligned} \quad (13)$$

218 From this solution, it can be shown that increasing the eccentricity substantially  
219 increases the flow rate (see Figs. 3–10 in [34]). This solution can be used as a check  
220 on the computations of the effect of eccentricity in our model PVS in the particular  
221 case where the outer boundary is a circle.

## 222 Results

### 223 The eccentric circular annulus

224 The eccentric circular annulus is a good model for the PVSs around some pene-  
225 trating arteries (see Fig. 1E,F), so it is useful to show how the volume flow rate  
226 and hydraulic resistance vary for this model. This is done in Figure 3A, where the  
227 hydraulic resistance (inverse of the volume flow rate) is plotted as a function of the  
228 dimensionless eccentricity  $c/(r_2 - r_1) = \epsilon/(\alpha - 1)$  for various values of the area ratio  
229  $K = \alpha^2 - 1$ . The first thing to notice in this plot is how strongly the hydraulic  
230 resistance depends on the cross-sectional area of the PVS (i.e., on  $K$ ). For example,  
231 in the case of a concentric circular annulus ( $\epsilon = 0$ ), the resistance decreases by  
232 about a factor of 1700 as the area increases by a factor of 15 ( $K$  goes from 0.2 to  
233 3.0).

234 For fixed  $K$ , the hydraulic resistance decreases monotonically with increasing  
235 eccentricity (see Fig. 3A). This occurs because the fluid flow concentrates more and  
236 more into the wide part of the gap, where it is farther from the walls and thus  
237 achieves a higher velocity for a given shear stress (which is fixed by the pressure  
238 gradient). (This phenomenon is well known in hydraulics, where needle valves tend  
239 to leak badly if the needle is flexible enough to be able to bend to one side of the  
240 circular orifice.) The increase of flow rate (decrease of resistance) is well illustrated  
241 in Figures 3C–E, which show numerically computed velocity profiles (as color maps)  
242 at three different eccentricities. We refer to the case where the inner circle touches  
243 the outer circle ( $\epsilon/(\alpha - 1) = 1$ ) as the “tangent eccentric circular annulus.”

244 We have plotted the hydraulic resistance as a function of the area ratio  $K$  for the  
245 concentric circular annulus and the tangent eccentric circular annulus in Figure 3B.

246 This plot reveals that across a wide range of area ratios, the tangent eccentric cir-  
247 cular annulus (shown in Fig. 3E) has a hydraulic resistance that is approximately  
248 2.5 times lower than the concentric circular annulus (shown in Fig. 3C), for a fixed  
249 value of  $K$ . Intermediate values of eccentricity ( $0 \leq \epsilon/(\alpha - 1) \leq 1$ ), where the  
250 inner circle does not touch the outer circle (e.g., Fig. 3D) correspond to a reduc-  
251 tion in hydraulic resistance that is less than a factor of 2.5. The variation with  
252  $K$  of hydraulic resistance of the tangent eccentric annulus fits reasonably well to a  
253 power law  $r_1^4 \mathcal{R}/\mu = 8.91K^{-2.78}$  throughout most of the range of observed  $K$  values,  
254 indicated by the gray shaded region in Figure 3B.

### 255 **The concentric elliptical annulus**

256 Now we turn to the results for the elliptical annulus in the case where the ellipse  
257 and the inner circle are concentric. Figure 4 shows numerically computed velocity  
258 profiles for three different configurations with the same area ratio ( $K = 1.4$ ): a  
259 moderately elongated annulus, the case where the ellipse is tangent to the circle at  
260 the top and bottom, and a case with two distinct lobes. A comparison of these three  
261 cases with the concentric circular annulus (Fig. 3B) shows quite clearly how the flow  
262 is enhanced when the outer ellipse is flattened, leading to spaces on either side of the  
263 artery with wide gaps in which much of the fluid is far from the boundaries and the  
264 shear is reduced. However, Figure 4C shows a reduction in the volume flow rate (i.e.  
265 less pink in the velocity profile) compared to Figures 4A,B, showing that elongating  
266 the outer ellipse too much makes the gaps narrow again, reducing the volume flow  
267 rate (increasing the hydraulic resistance). This results suggests that, for a given  
268 value of  $K$  (given cross-sectional area), there is an optimal value of the elongation  
269  $\alpha$  that maximizes the volume flow rate (minimizes the hydraulic resistance).

270 To test this hypothesis, we computed the volume flow rate and hydraulic resistance  
271 as a function of the shape parameter  $(\alpha - \beta)/K$  for several values of the area ratio  
272  $K$ . The results are plotted in Figure 5A. Note that the plot is only shown for  
273  $(\alpha - \beta)/K \geq 0$ , since the curves are symmetric about  $(\alpha - \beta)/K = 0$ . The left end of  
274 each curve ( $(\alpha - \beta)/K = 0$ ) corresponds to a circular annulus, and the black circles  
275 indicate the value of  $\mathcal{R}$  given by the analytical solution in equation (11). These  
276 values agree with the corresponding numerical solution to within 1%. The resistance  
277 varies smoothly as the outer elliptical boundary becomes more elongated, and our

278 hypothesis is confirmed: for each curve, the hydraulic resistance reaches a minimum  
279 value at a value of  $(\alpha - \beta)/K$  that varies with  $K$ , such that the corresponding shape  
280 is optimal for fast, efficient CSF flow. Typically, the resistance drops by at least a  
281 factor of two as the outer boundary goes from circular to the tangent ellipse. If we  
282 elongate the ellipse even further (beyond the tangent case), thus dividing the PVS  
283 into two separate lobes, the resistance continues to decrease but reaches a minimum  
284 and then increases. The reason for this increase is that, as the ellipse becomes highly  
285 elongated, it forms a narrow gap itself, and the relevant length scale for the shear  
286 in velocity is the width of the ellipse, not the distance to the inner circle. For small  
287 values of  $K$ , we find that the optimal shape parameter  $(\alpha - \beta)/K$  tends to be  
288 large and the ellipse is highly elongated, while for large values of  $K$  the optimal  
289 shape parameter is small. The velocity profiles for three optimal configurations (for  
290  $K = 0.4, 1.4, \text{ and } 2.4$ ) are plotted in Figures 5C–E.

291 The hydraulic resistance of shapes with optimal elongation also varies with the  
292 area ratio  $K$ , as shown in Figure 5B. As discussed above, the resistance decreases  
293 rapidly as  $K$  increases and is lower than the resistance of concentric, circular annuli,  
294 which are also shown. We find that the optimal elliptical annulus, compared to the  
295 concentric circular annulus, provides the greatest reduction in hydraulic resistance  
296 for the smallest area ratios  $K$ . Although the two curves converge as  $K$  grows, they  
297 differ substantially throughout most of the range of normalized PVS areas observed  
298 *in vivo*. We find that the variation with  $K$  of hydraulic resistance of optimal shapes  
299 fits closely to a power law  $r_1^4 \mathcal{R}/\mu = 6.67K^{-1.96}$ .

### 300 **The eccentric elliptical annulus**

301 We have also calculated the hydraulic resistance for cases where the outer boundary  
302 is elliptical and the inner and outer boundaries are not concentric (see Fig. 2B). For  
303 this purpose, we introduce the nondimensional eccentricities

$$304 \quad \epsilon_x = \frac{c}{r_1}, \quad \epsilon_y = \frac{d}{r_1}. \quad (14)$$

305 The hydraulic resistance is plotted in Figures 6A,B as a function of  $\epsilon_x$  and  $\epsilon_y$ ,  
306 respectively, and clearly demonstrates that adding any eccentricity decreases the  
307 hydraulic resistance, similar to the eccentric circular annulus shown in Figure 3.  
308 In the case where the outer boundary is a circle ( $\alpha = \beta > 1$ ,  $\epsilon = (\epsilon_x^2 + \epsilon_y^2)^{1/2}$ )

309 we employ the analytical solution (12) as a check on the numerical solution: they  
310 agree to within 0.4%. Two example velocity profiles are plotted in Figures 6C,D.  
311 Comparing these profiles to the concentric profile plotted in Figure 4A clearly shows  
312 that eccentricity increases the volume flow rate (decreases the hydraulic resistance).

### 313 **In vivo PVSs near pial arteries are nearly optimal in shape**

314 We can compute the velocity profiles for the geometries corresponding to the actual  
315 pial PVSs shown in Figures 1B–D (dotted and solid white lines). The parameters  
316 corresponding to these fits are provided in Table 1 and are based on the model shown  
317 in Figure 2B, which allows for eccentricity. Figure 7A shows how hydraulic resistance  
318 varies with elongation for non-concentric PVSs having the same area ratio  $K$  and  
319 eccentricities  $\epsilon_x$  and  $\epsilon_y$  as the ones in Figures 1B–D. The computed values of the  
320 hydraulic resistance of the actual observed shapes are plotted as purple triangles. For  
321 comparison, velocity profiles for the optimal elongation and the exact fits provided  
322 in Table 1 are shown in Figure 7B–D. Clearly the hydraulic resistances of the shapes  
323 observed *in vivo* are very close to the optimal values, but systematically shifted to  
324 slightly more elongated shapes. Even when  $(\alpha - \beta)/K$  differs substantially between  
325 the observed shapes and the optimal ones, the hydraulic resistance  $\mathcal{R}$ , which sets the  
326 pumping efficiency and is therefore the biologically important parameter, matches  
327 the optimal value quite closely.

## 328 **Discussion**

329 In order to understand the glymphatic system, and various effects on its operation,  
330 it will be very helpful to develop a predictive hydraulic model of CSF flow in the  
331 PVSs. Such a model must take into account two important recent findings: (i) the  
332 PVSs, as measured *in vivo*, are generally much larger than the size determined from  
333 post-fixation data [7, 8, 32] and hence offer much lower hydraulic resistance; and  
334 (ii) (as we demonstrate in this paper) the concentric circular annulus model is not  
335 a good geometric representation of an actual PVS, as it overestimates the hydraulic  
336 resistance. With these two factors accounted for, we can expect a hydraulic-network  
337 model to produce results in accordance with the actual bulk flow now observed  
338 directly in particle tracking experiments [7, 8]. The relatively simple, adjustable  
339 model of a PVS that we present here can be used as a basis for calculating the

340 hydraulic resistance of a wide range of observed PVS shapes, throughout the brain  
341 and spinal cord. Our calculations demonstrate that accounting for PVS shape can  
342 reduce the hydraulic resistance by a factor as large as 6.45 (see Table 1).

343 We raise the intriguing possibility that the non-circular and eccentric configura-  
344 tions of PVSs surrounding pial arteries are an evolutionary adaptation that lowers  
345 the hydraulic resistance and permits faster bulk flow of CSF. The *in vivo* images  
346 (e.g., those in Fig. 1B–D) reveal that the cross-section of the PVS around a pial  
347 artery is not a concentric circular annulus, but instead is significantly flattened and  
348 often consists of two separate lobes positioned symmetrically on each side of the  
349 artery. Tracers are mostly moving within these separate tunnels and only to a lim-  
350 ited extent passing between them. Our imaging of tens of thousands of microspheres  
351 has revealed that crossing is rare, indicating almost total separation between the  
352 two tunnels. The arrangement of the two PVS lobes surrounding a pial artery not  
353 only reduces the hydraulic resistance but may also enhance the stability of the PVS  
354 and prevent collapse of the space during excessive movement of the brain within  
355 the skull. Additionally, PVSs with wide spaces may facilitate immune response by  
356 allowing macrophages to travel through the brain, as suggested by Schain *et al.* [32].  
357 We note that if CSF flowed through a cylindrical vessel separate from the vascu-  
358 lature (not an annulus), hydraulic resistance would be even lower. However, there  
359 are reasons that likely require PVSs to be annular and adjacent to the vascula-  
360 ture, including: (i) arterial pulsations drive CSF flow [8], and (ii) astrocyte endfeet,  
361 which form the outer boundary of the PVS, regulate molecular transport from both  
362 arteries and CSF [36, 37].

363 The configuration of PVSs surrounding penetrating arteries in the cortex and  
364 striatum is largely unknown [38]. To our knowledge, all existing models are based on  
365 information obtained using measurements from fixed tissue. Our own impression,  
366 based on years of *in vivo* imaging of CSF tracer transport, is that the tracers  
367 distribute asymmetrically along the wall of penetrating arteries, suggesting that  
368 the PVSs here are eccentric. Clearly, we need new *in vivo* techniques that produce  
369 detailed maps of tracer distribution along penetrating arteries. Regional differences  
370 may exist, as suggested by the finding that, in the human brain, the striate branches  
371 of the middle cerebral artery are surrounded by three layers of fibrous membrane,  
372 instead of the two layers that surround cortical penetrating arteries [38]. Accurately

373 characterizing the shapes and sizes of the most distal PVSs along the arterial tree is  
374 very important, as prior work [31] suggests the hydraulic resistance is largest there.  
375 We speculate that the configuration of the PVSs at these locations may be optimal  
376 as well.

377 An intriguing possibility for future study is that minor changes in the configura-  
378 tion of PVS spaces may contribute to the sleep-wake regulation of the glymphatic  
379 system [39]. Also, age-dependent changes of the configuration of PVSs may increase  
380 the resistance to fluid flow, possibly contributing to the increased risk of amyloid-  
381 beta accumulation associated with aging [40]. Similarly, reactive remodeling of the  
382 PVSs in the aftermath of a traumatic brain injury may increase the hydraulic re-  
383 sistance of PVSs and thereby increase amyloid-beta accumulation.

384 There are limitations to the modeling presented here, which can be overcome by  
385 straightforward extensions of the calculations we have presented. We have intention-  
386 ally chosen a relatively simple geometry in order to show clearly the dependence  
387 of the hydraulic resistance on the size, shape, and eccentricity of the PVS. How-  
388 ever, the fits presented in Figure 1B–F are imperfect and could be better captured  
389 using high-order polygons, which is an easy extension of the numerical method we  
390 have employed. Our calculations have been performed assuming that PVSs are open  
391 channels, which is arguably justified – at least for PVSs around pial arteries – by  
392 the smooth trajectories observed for 1  $\mu\text{m}$  beads flowing through PVSs and the  
393 observation that these spaces collapse during the fixation process [8]. However, the  
394 implementation of a Darcy-Brinkman model to capture the effect of porosity would  
395 simply increase the resistance  $\mathcal{R}$ , given a fixed flow rate  $Q$  and Darcy number  $Da$ ,  
396 by some multiplicative constant.

397 The hydraulic resistances we have calculated are for steady laminar flow driven by  
398 a constant overall pressure gradient. However, recent quantitative measurements in  
399 mice have offered substantial evidence demonstrating that CSF flow in PVSs sur-  
400 rounding the middle cerebral artery is pulsatile, driven by peristaltic pumping due  
401 to arterial wall motions generated by the heartbeat, with mean (bulk) flow in the  
402 same direction as the blood flow [8]. We hypothesize that this “perivascular pump-  
403 ing” occurs mainly in the periarterial spaces around the proximal sections of the  
404 main cerebral arteries: at more distal locations the wall motions become increasingly  
405 passive, and the flow is driven mainly by the oscillating pressure gradient generated

406 by the perivascular pumping upstream. Viscous, incompressible duct flows due to  
407 oscillating pressure gradients are well understood: it is a linear problem, and ana-  
408 lytical solutions are known for a few simple duct shapes. The nature of the solution  
409 depends on the *dynamic Reynolds number*  $R_d = \omega \ell^2 / \nu$ , where  $\omega$  is the angular fre-  
410 quency of the oscillating pressure gradient,  $\nu$  is the kinematic viscosity, and  $\ell$  is the  
411 length scale of the duct (e.g, the inner radius of a circular pipe, or the gap width for  
412 an annular pipe). (Alternatively, the *Womersley number*  $W = \sqrt{R_d}$  is often used  
413 in biofluid mechanics.) When  $R_d \ll 1$ , as it is in the case of flows in PVSs,<sup>[1]</sup>  
414 the velocity profile at any instant of time is very nearly that of a steady laminar  
415 flow, and the profile varies in time in phase with the oscillating pressure gradient  
416 (see White [34], sec. 3-4.2). In this case, the average (bulk) volume flow rate will  
417 be inversely proportional to exactly the same hydraulic resistance that applies to  
418 steady laminar flow. Hence, the hydraulic resistances we have computed here will  
419 apply to PVSs throughout the brain, except for proximal sections of main arteries  
420 where the perivascular pumping is actually taking place.

421 In periarterial spaces where the perivascular pumping is significant, the picture is  
422 somewhat different. Here, the flow is actively driven by traveling wave motions of  
423 the arterial wall, or in the context of our model PVS, waves along the inner circular  
424 boundary. In the case of an elliptical outer boundary, we expect the flow to be  
425 three-dimensional, with secondary motions in the azimuthal direction (around the  
426 annulus, not down the channel), even though the wave along the inner boundary is  
427 axisymmetric. Although we have not yet modeled this flow, we can offer a qualitative  
428 description based on an analytical solution for perivascular pumping in the case of  
429 concentric circular cylinders [14]. The effectiveness of the pumping scales as  $(b/\ell)^2$ ,  
430 where  $b$  is the amplitude of the wall wave and  $\ell$  is the width of the gap between the  
431 inner and outer boundaries. For the case of a concentric circular annulus, the gap  
432 width  $\ell$  and hence the pumping effectiveness are axisymmetric, and therefore the  
433 resulting flow is also axisymmetric. For an elliptical outer boundary, however, the  
434 gap width  $\ell$  varies in the azimuthal direction and so will the pumping effectiveness.  
435 Hence, there will be pressure variations in the azimuthal direction that will drive a  
436 secondary, oscillatory flow in the azimuthal direction, and as a result the flow will

---

<sup>[1]</sup>For example, for  $\omega = 25.13 \text{ s}^{-1}$  (corresponding to a pulse rate of 240 bpm),  $\ell = 20 \text{ }\mu\text{m}$ , and  $\nu = 7.0 \times 10^{-7} \text{ m}^2 \text{ s}^{-1}$ , we have  $R_d = 1.4 \times 10^{-2}$ .

437 be non-axisymmetric and the streamlines will wiggle in the azimuthal direction.  
438 Increasing the aspect ratio  $r_2/r_3$  of the ellipse for a fixed area ratio will decrease  
439 the flow resistance but will also decrease the overall pumping efficiency, not only  
440 because more of the fluid is placed farther from the artery wall, but also, in cases  
441 where the PVS is split into two lobes, not all of the artery wall is involved in  
442 the pumping. Therefore, we expect that there will be an optimal aspect ratio of  
443 the outer ellipse that will produce the maximum mean flow rate due to perivascular  
444 pumping, and that this optimal ratio will be somewhat different from that which just  
445 produces the lowest hydraulic resistance. We speculate that evolutionary adaptation  
446 has produced shapes of actual periarterial spaces around proximal sections of main  
447 arteries that are nearly optimal in this sense.

## 448 **Conclusions**

449 Perivascular spaces, which are part of the glymphatic system [6], provide a route  
450 for rapid influx of cerebrospinal fluid into the brain and a pathway for the removal  
451 of metabolic wastes from the brain. In this study, we have introduced an elliptical  
452 annulus model that captures the shape of PVSs more accurately than the circular  
453 annulus model that has been used in all prior modeling studies. We have demon-  
454 strated that for both the circular and elliptical annulus models, non-zero eccentricity  
455 (i.e., shifting the inner circular boundary off center) decreases the hydraulic resis-  
456 tance (increases the volume flow rate) for PVSs. By adjusting the shape of the  
457 elliptical annulus with fixed PVS area and computing the hydraulic resistance, we  
458 found that there is an optimal PVS elongation for which the hydraulic resistance is  
459 minimized (the volume flow rate is maximized). We find that these optimal shapes  
460 closely resemble actual pial PVSs observed *in vivo*, suggesting such shapes may be  
461 a result of evolutionary optimization.

462 The elliptical annulus model introduced here offers an improvement for future  
463 hydraulic network models of the glymphatic system, which may help reconcile the  
464 discrepancy between the small PVS flow speeds predicted by many models and the  
465 relatively large flow speeds recently measured *in vivo* [7, 8]. Our proposed modeling  
466 improvements can be used to obtain simple scaling laws, such as the power laws  
467 obtained for the tangent eccentric circular annulus in Figure 3B or the optimal  
468 elliptical annulus in Figure 5B.



469 **Abbreviations**

470 CSF: cerebrospinal fluid; PVS: perivascular space.

471 **Author contributions**

472 JHT developed the theoretical ideas and the geometric model and outlined the calculations. JT and DHK carried  
473 out the calculations. HM and MN provided information on actual PVS shapes and flows. JHT, JT, and DHK  
474 analyzed the results and wrote the paper.

475 **Acknowledgements**

476 We thank Dan Xue for assistance with illustrations.

477 **Competing interests**

478 The authors declare that they have no competing interests.

479 **Availability of data and materials**

480 All data generated and analyzed in the course of this study are available from the corresponding author upon  
481 reasonable request.

482 **Ethics approval and consent to participate**

483 Not applicable.

484 **Funding**

485 This work was supported by a grant from the NIH/National Institute of Aging (RF1 AG057575-01 to MN, JHT, and  
486 DHK).

487 **Author details**

488 <sup>1</sup>Department of Mechanical Engineering, University of Rochester, Rochester, NY 14627, USA. <sup>2</sup>Center for  
489 Translational Neuromedicine, University of Rochester Medical Center, Rochester, NY 14642, USA.

490 **References**

- 491 1. Cserr, H., Cooper, D., Milhorat, T.: Flow of cerebral interstitial fluid as indicated by the removal of extracellular  
492 markers from rat caudate nucleus. *Exp Eye Res* **25**, 461–473 (1977)
- 493 2. Hladky, S.B., Barrand, M.A.: Elimination of substances from the brain parenchyma: efflux via perivascular  
494 pathways and via the blood–brain barrier. *Fluids Barriers CNS* **15**(1), 30 (2018)
- 495 3. Plog, B., Nedergaard, M.: The glymphatic system in central nervous system health and disease: past, present,  
496 and future. *Annu Rev Pathol-Mech* **13**, 379–394 (2018)
- 497 4. Rennels, M., Gregory, T., Blaumanis, O., Fujimoto, K., Grady, P.: Evidence for a ‘aravascular’ fluid circulation  
498 in the mammalian central nervous system, provided by the rapid distribution of tracer protein throughout the  
499 brain from the subarachnoid space. *Brain Res* **326**(1), 47–63 (1985)
- 500 5. Ichimura, T., Fraser, P., Cserr, H.: Distribution of extracellular tracers in perivascular spaces of the rat brain.  
501 *Brain Res* **545**(1), 103–113 (1991)
- 502 6. Iliff, J., Wang, M., Liao, Y., Plogg, B., Peng, W., Gundersen, G., Benveniste, H., Vates, G., Deane, R.,  
503 Goldman, S., Nagelhus, E., Nedergaard, M.: A paravascular pathway facilitates CSF flow through the brain  
504 parenchyma and the clearance of interstitial solutes, including amyloid  $\beta$ . *Sci Transl Med* **4**(147), 147–111  
505 (2012)
- 506 7. Bedussi, B., Almasian, M., de Vos, J., VanBavel, E., Bakker, E.: Paravascular spaces at the brain surface: Low  
507 resistance pathways for cerebrospinal fluid flow. *J Cerebr Blood F Met*, 0271678–17737988 (2017)
- 508 8. Mestre, H., Tithof, J., Du, T., Song, W., Peng, W., Sweeney, A., Olveda, G., Thomas, J., Nedergaard, M.,  
509 Kelley, D.: Flow of cerebrospinal fluid is driven by arterial pulsations and is reduced in hypertension. *Nat*  
510 *Commun* **9**(1), 4878 (2018)
- 511 9. Bilston, L., Fletcher, D., Brodbelt, A., Stoodley, M.: Arterial pulsation-driven cerebrospinal fluid flow in the  
512 perivascular space: A computational model. *Comput. Method. Biomech.* **6**(4), 235–241 (2003)
- 513 10. Schley, D., Carare-Nnadi, R., Please, C.P., Perry, V.H., Weller, R.O.: Mechanisms to explain the reverse  
514 perivascular transport of solutes out of the brain. *J. Theor. Biol.* **238**(4), 962–974 (2006)

- 515 11. Asgari, M., de Zélicourt, D., Kurtcuoglu, V.: Glymphatic solute transport does not require bulk flow. *Sci Rep*,  
516 1–11 (2016)
- 517 12. Rey, J., Sarntinoranont, M.: Pulsatile flow drivers in brain parenchyma and perivascular spaces: a resistance  
518 network model study. *Fluids Barriers CNS* **15**(1), 20 (2018)
- 519 13. Aldea, R., Weller, R.O., Wilcock, D.M., Carare, R.O., Richardson, G.: Cerebrovascular smooth muscle cells as  
520 the drivers of intramural periarterial drainage of the brain. *Front. Aging Neurosci.* **11** (2019)
- 521 14. Wang, P., Olbricht, W.: Fluid mechanics in the perivascular space. *J Theor Biol* **274**(1), 52–57 (2011)
- 522 15. Sharp, M., Diem, A., Weller, R., Carare, R.: Peristalsis with oscillating flow resistance: A mechanism for  
523 periarterial clearance of amyloid beta from the brain. *Ann Biomed Eng* **44**(5), 1553–1565 (2016)
- 524 16. Jessen, N., Munk, A., Lundgaard, I., Nedergaard, M.: The glymphatic system: A beginner's guide. *Neurochem*  
525 *Res* **40**(12), 2583–2599 (2015)
- 526 17. Loth, F., Yardimci, M.A., Alperin, N.: Hydrodynamic modeling of cerebrospinal fluid motion within the spinal  
527 cavity. *J. Biomed. Eng.*, 71–79 (2001)
- 528 18. Linge, S.O., Haughton, V., Løvgrén, A.E., Mardal, K.A., Langtangen, H.P.: CSF flow dynamics at the  
529 craniovertebral junction studied with an idealized model of the subarachnoid space and computational flow  
530 analysis. *Am. J. Neuroradiol.* **31**(1), 185–192 (2010)
- 531 19. Heil, M., Bertram, C.D.: A poroelastic fluid–structure interaction model of syringomyelia. *J. Fluid Mech.* **809**,  
532 360–389 (2016)
- 533 20. Rutkowska, G., Haughton, V., Linge, S., Mardal, K.-A.: Patient-specific 3D simulation of cyclic CSF flow at the  
534 craniocervical region. *Am. J. Neuroradiol.* **33**(9), 1756–1762 (2012)
- 535 21. Støverud, K.-H., Langtangen, H.P., Ringstad, G.A., Eide, P.K., Mardal, K.-A.: Computational investigation of  
536 cerebrospinal fluid dynamics in the posterior cranial fossa and cervical subarachnoid space in patients with  
537 Chiari I malformation. *PloS one* **11**(10), 0162938 (2016)
- 538 22. Pahlavian, S.H., Bunck, A.C., Thyagaraj, S., Giese, D., Loth, F., Hedderich, D.M., Kröger, J.R., Martin, B.A.:  
539 Accuracy of 4D flow measurement of cerebrospinal fluid dynamics in the cervical spine: an in vitro verification  
540 against numerical simulation. *Annals of biomedical engineering* **44**(11), 3202–3214 (2016)
- 541 23. Elliott, N.S.J., Bertram, C.D., Martin, B.A., Brodbelt, A.R.: Syringomyelia: a review of the biomechanics. *J.*  
542 *Fluid. Struct.* **40**, 1–24 (2013)
- 543 24. Haughton, V., Mardal, K.-A.: Spinal fluid biomechanics and imaging: an update for neuroradiologists. *Am. J.*  
544 *Neuroradiol.* **35**(10), 1864–1869 (2014)
- 545 25. Linninger, A.A., Tangen, K., Hsu, C.-Y., Frim, D.: Cerebrospinal fluid mechanics and its coupling to  
546 cerebrovascular dynamics. *Annu. Rev. Fluid Mech.* **48**, 219–257 (2016)
- 547 26. Smith, A.J., Yao, X., Dix, J.A., Jin, B.-J., Verkman, A.S.: Test of the 'glymphatic' hypothesis demonstrates  
548 diffusive and aquaporin-4-independent solute transport in rodent brain parenchyma. *eLife* **6**, 27679 (2017)
- 549 27. Mestre, H., Hablitz, L.M., Xavier, A.L.R., Feng, W., Zou, W., Pu, T., Monai, H., Murlidharan, G.,  
550 Castellanos Rivera, R.M., Simon, M.J., Pike, M.M., Plà, V., Du, T., Kress, B.T., Wang, X., Plog, B.A.,  
551 Thrane, A.S., Lundgaard, I., Abe, Y., Yasui, M., Thomas, J.H., Xiao, M., Hirase, H., Asokan, A., Iliff, J.J.,  
552 Nedergaard, M.: Aquaporin-4-dependent glymphatic solute transport in the rodent brain. *eLife* **7**, 40070 (2018)
- 553 28. Mardal, K.A., Rutkowska, G., Linge, S., Haughton, V.: Estimation of CSF flow resistance in the upper cervical  
554 spine. *Neuroradiol. J.* **26**(1), 106–110 (2013)
- 555 29. Tangen, K.M., Hsu, Y., Zhu, D.C., Linninger, A.A.: CNS wide simulation of flow resistance and drug transport  
556 due to spinal microanatomy. *J. Biomech.* **48**(10), 2144–2154 (2015)
- 557 30. Asgari, M., De Zélicourt, D., Kurtcuoglu, V.: How astrocyte networks may contribute to cerebral metabolite  
558 clearance. *Sci. Rep.* **5**, 15024 (2015)
- 559 31. Faghih, M., Sharp, M.: Is bulk flow plausible in perivascular, paravascular and paravenous channels? *Fluids*  
560 *Barriers CNS*, 1–10 (2018)
- 561 32. Schain, A., Melo-Carrillo, A., Strassman, A., Burstein, R.: Cortical spreading depression closes paravascular  
562 space and impairs glymphatic flow: Implications for migraine headache. *J Neurosci* **37**(11), 2904–2915 (2017)
- 563 33. Achariyar, T., Li, B., Peng, W., Vergheze, P., Shi, Y., McConnell, E., Benraiss, A., Kasper, T., Song, W.,  
564 Takano, T., Holtzman, D., Nedergaard, M., Deane, R.: Glymphatic distribution of CSF-derived apoE into brain  
565 is isoform specific and suppressed during sleep deprivation. *Mol Neurodegener.* 1–20 (2017)

- 566 34. White, F.: Viscous Fluid Flow, 3rd edn. McGraw-Hill, New York (2006)
- 567 35. Piercy, N., Hooper, M., Winny, H.: LIII. Viscous flow through pipes with cores. *Philos Mag* **15**(99), 647–676  
568 (1933)
- 569 36. Rouach, N., Koulakoff, A., Abudara, V., Willecke, K., Giaume, C.: Astroglial metabolic networks sustain  
570 hippocampal synaptic transmission. *Science* **322**(5907), 1551–1555 (2008)
- 571 37. Pellerin, L., Magistretti, P.: Glutamate uptake into astrocytes stimulates aerobic glycolysis: a mechanism  
572 coupling neuronal activity to glucose utilization. *P. Natl. Acad. Sci.* **91**(22), 10625–10629 (1994)
- 573 38. Zhang, E., Inman, C., Weller, R.: Interrelationships of the pia mater and the perivascular (Virchow-Robin)  
574 spaces in the human cerebrum. *J Anat* **170**, 111 (1990)
- 575 39. Xie, L., Kang, H., Xu, Q., Chen, M., Liao, Y., Thiyagarajan, M., O'Donnell, J., Christensen, D., Nicholson, C.,  
576 Iliff, J., Takano, T., Deane, R., Nedergaard, M.: Sleep drives metabolite clearance from the adult brain. *Science*  
577 **342**(6156), 373–377 (2013)
- 578 40. Kress, B., Iliff, J., Xia, M., Wang, M., Wei, H., Zeppenfeld, D., Xie, L., Kang, H., Xu, Q., Liew, J., Plog, B.,  
579 Ding, F., Deane, R., Nedergaard, M.: Impairment of paravascular clearance pathways in the aging brain. *Ann*  
580 *Neurol* **76**(6), 845–861 (2014)

581 **Figures**

582 **Tables**

**Table 1:** Geometry and resistance of perivascular spaces visualized *in vivo*. Labels correspond to panel labels in Figure 1. The last column gives the ratio of the hydraulic resistance  $\mathcal{R}_o$  of a circular annulus with the same area ratio  $K$  to the value  $\mathcal{R}$  computed for the specified geometry.

| Label | $r_1$               | $r_2$              | $r_3$               | $A_{art}$                        | $A_{pvs}$                         | $c$                       | $d$                           |
|-------|---------------------|--------------------|---------------------|----------------------------------|-----------------------------------|---------------------------|-------------------------------|
| B     | 19.92 $\mu\text{m}$ | 42.1 $\mu\text{m}$ | 8.09 $\mu\text{m}$  | 1169 $\mu\text{m}^2$             | 1059 $\mu\text{m}^2$              | -0.0428 $\mu\text{m}$     | 5.23 $\mu\text{m}$            |
| C     | 152.9 $\mu\text{m}$ | 449 $\mu\text{m}$  | 113.7 $\mu\text{m}$ | $6.63 \times 10^4 \mu\text{m}^2$ | $1.577 \times 10^5 \mu\text{m}^2$ | -67.6 $\mu\text{m}$       | 14.84 $\mu\text{m}$           |
| D     | 16.53 $\mu\text{m}$ | 58.6 $\mu\text{m}$ | 16.67 $\mu\text{m}$ | 742 $\mu\text{m}^2$              | 2670 $\mu\text{m}^2$              | -4.18 $\mu\text{m}$       | 6.55 $\mu\text{m}$            |
| E     | 4.63 $\mu\text{m}$  | 6.83 $\mu\text{m}$ | 5.42 $\mu\text{m}$  | 59.2 $\mu\text{m}^2$             | 113.5 $\mu\text{m}^2$             | -0.513 $\mu\text{m}$      | -4.61 $\mu\text{m}$           |
| F     | 7.21 $\mu\text{m}$  | 23.3 $\mu\text{m}$ | 15.40 $\mu\text{m}$ | 155.0 $\mu\text{m}^2$            | 1120 $\mu\text{m}^2$              | 0.1192 $\mu\text{m}$      | -5.74 $\mu\text{m}$           |
| Label | $\alpha$            | $\beta$            | $K$                 | $\epsilon_x$                     | $\epsilon_y$                      | $r_1^4 \mathcal{R} / \mu$ | $\mathcal{R}_o / \mathcal{R}$ |
| B     | 2.11                | 0.406              | 0.388               | -0.00215                         | 0.263                             | 48.0                      | 6.45                          |
| C     | 2.94                | 0.744              | 1.36                | -0.442                           | 0.0971                            | 3.56                      | 2.75                          |
| D     | 3.54                | 1.008              | 2.71                | -0.253                           | 0.396                             | 1.01                      | 1.62                          |
| E     | 1.476               | 1.172              | 1.18                | -0.1109                          | -0.997                            | 3.30                      | 4.29                          |
| F     | 3.24                | 2.14               | 5.93                | 0.0165                           | -0.797                            | 0.173                     | 1.38                          |

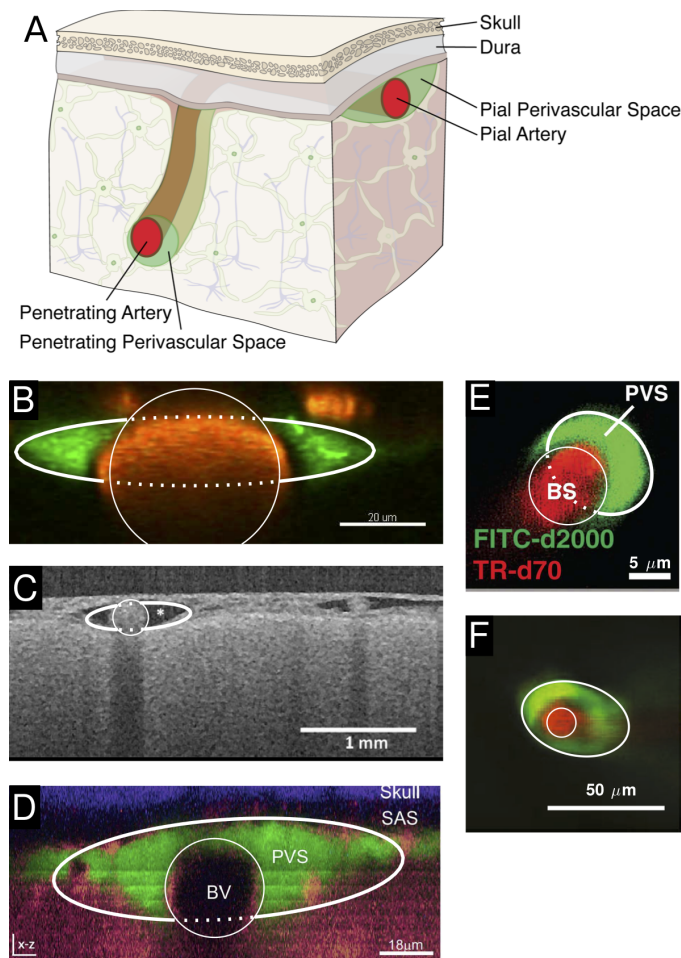

**Fig. 1:** Cross-sections of PVSs from *in vivo* dye experiments. **A** We consider PVSs in two regions: those adjacent to pial arteries and those adjacent to penetrating arteries. **B** PVS surrounding a murine pial artery, adapted from [8]. **C** PVS surrounding a human pial artery, adapted from [7]. **D** PVS surrounding a murine pial artery, adapted from [32]. **E** PVS surrounding a murine descending artery, adapted from [6]. **F** PVS surrounding a murine descending artery, adapted from [33]. For each image B-F, the best-fit inner circular and outer elliptical boundaries are plotted (thin and thick curves, respectively). The model PVS cross-section is the space within the ellipse but outside the circle. The dotted line does not represent an anatomical structure but is included to clearly indicate the fit. The parameter values for these fits are given in Table 1. PVSs surrounding pial arteries are oblate, not circular; PVSs surrounding descending arteries are more nearly circular, but are not concentric with the artery.

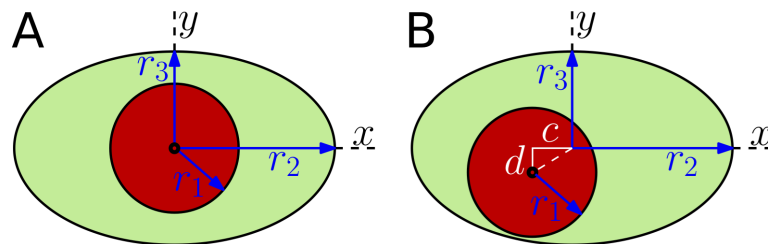

**Fig. 2:** Adjustable geometric models of the cross-section of a PVS, where the circle represents the outer boundary of the artery and the ellipse represents the outer boundary of the PVS. The circle and ellipse may be either **A** concentric or **B** non-concentric. In **A**, the geometry is parameterized by the circle radius  $r_1$  and the two axes of the ellipse  $r_2$  and  $r_3$ . In **B**, there are two additional parameters: eccentricities  $c$  along the  $x$ -direction and  $d$  along the  $y$ -direction.

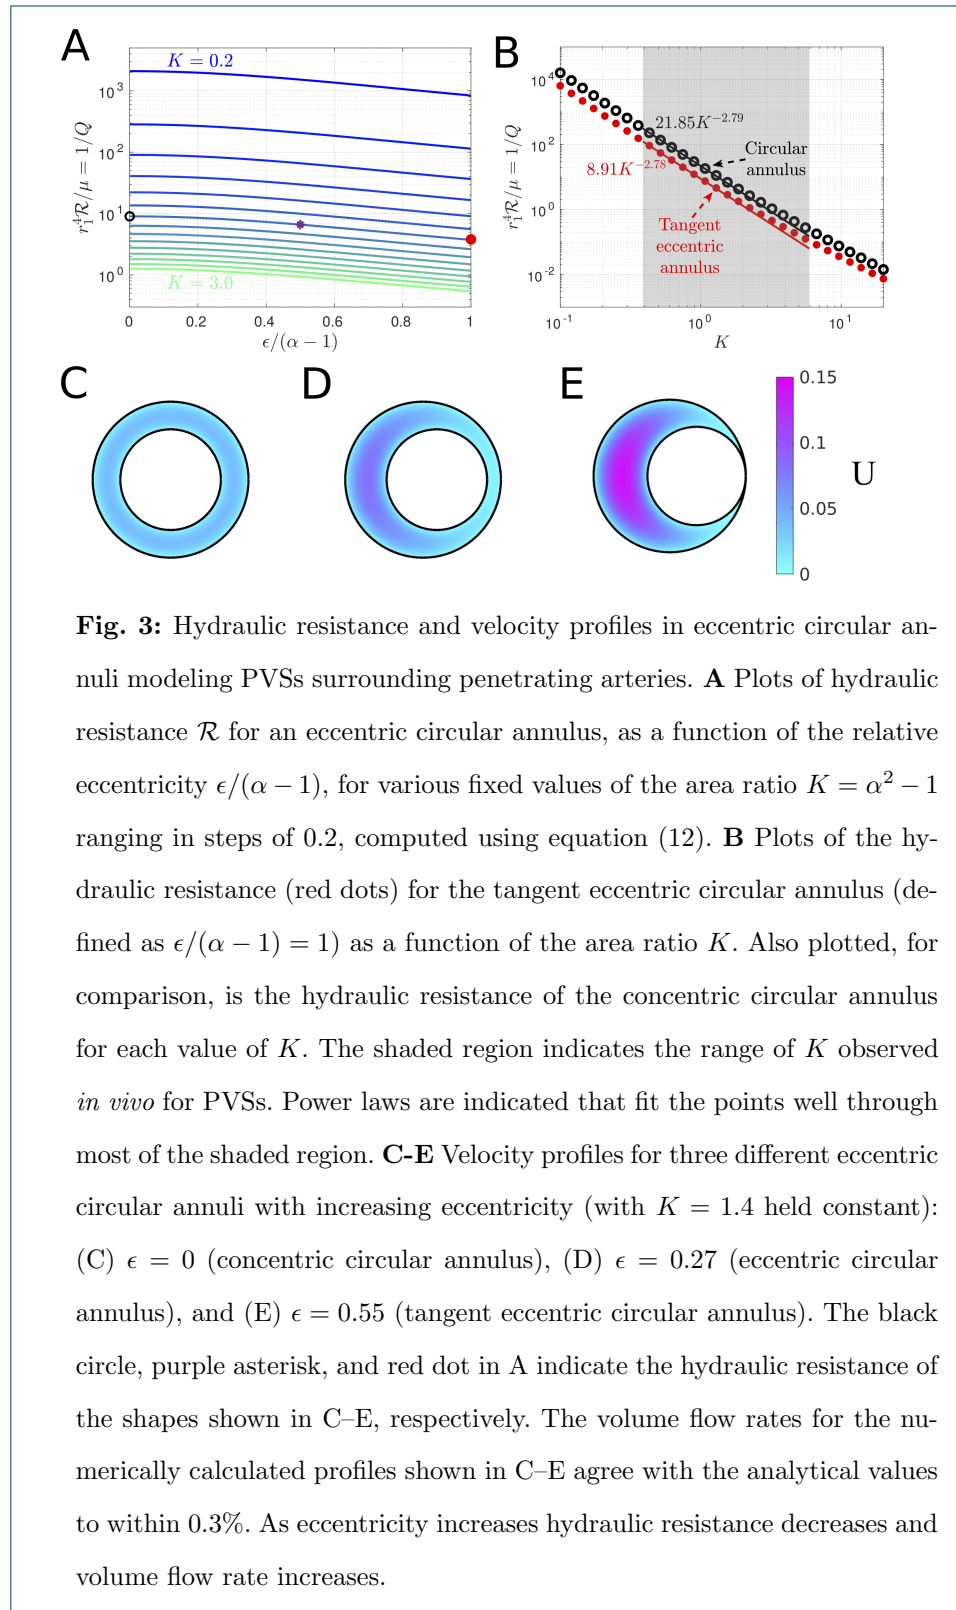

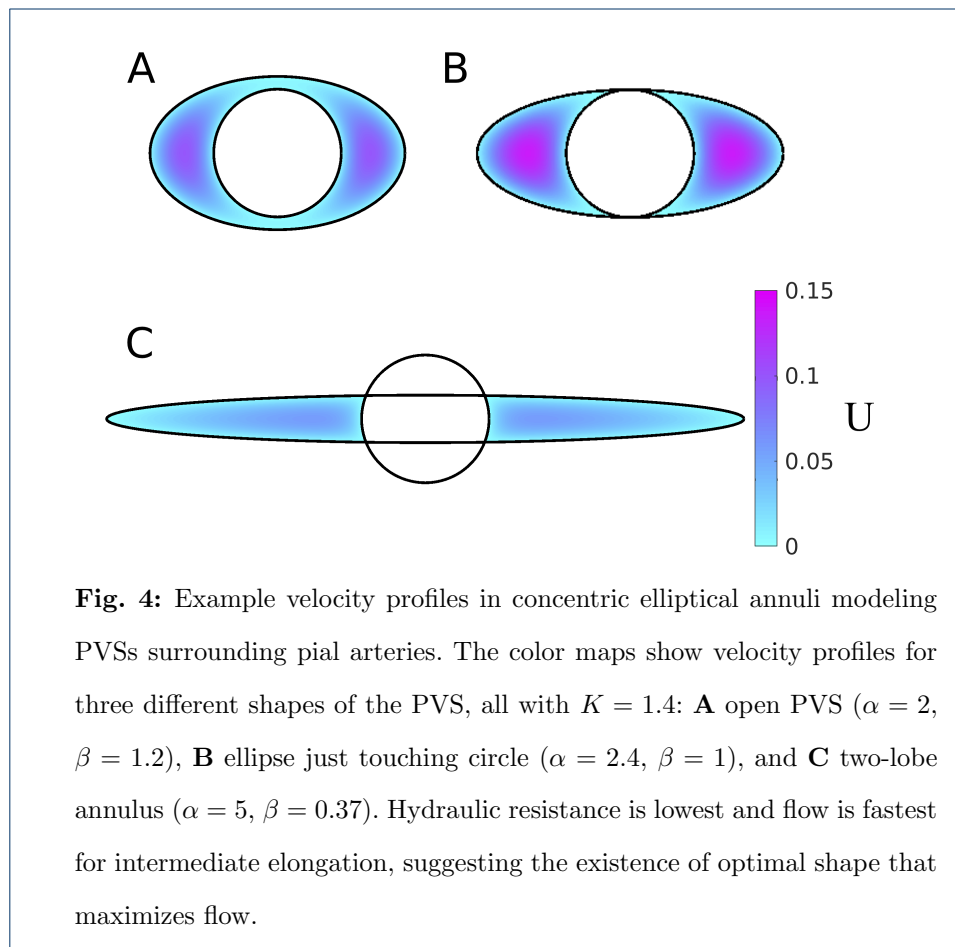

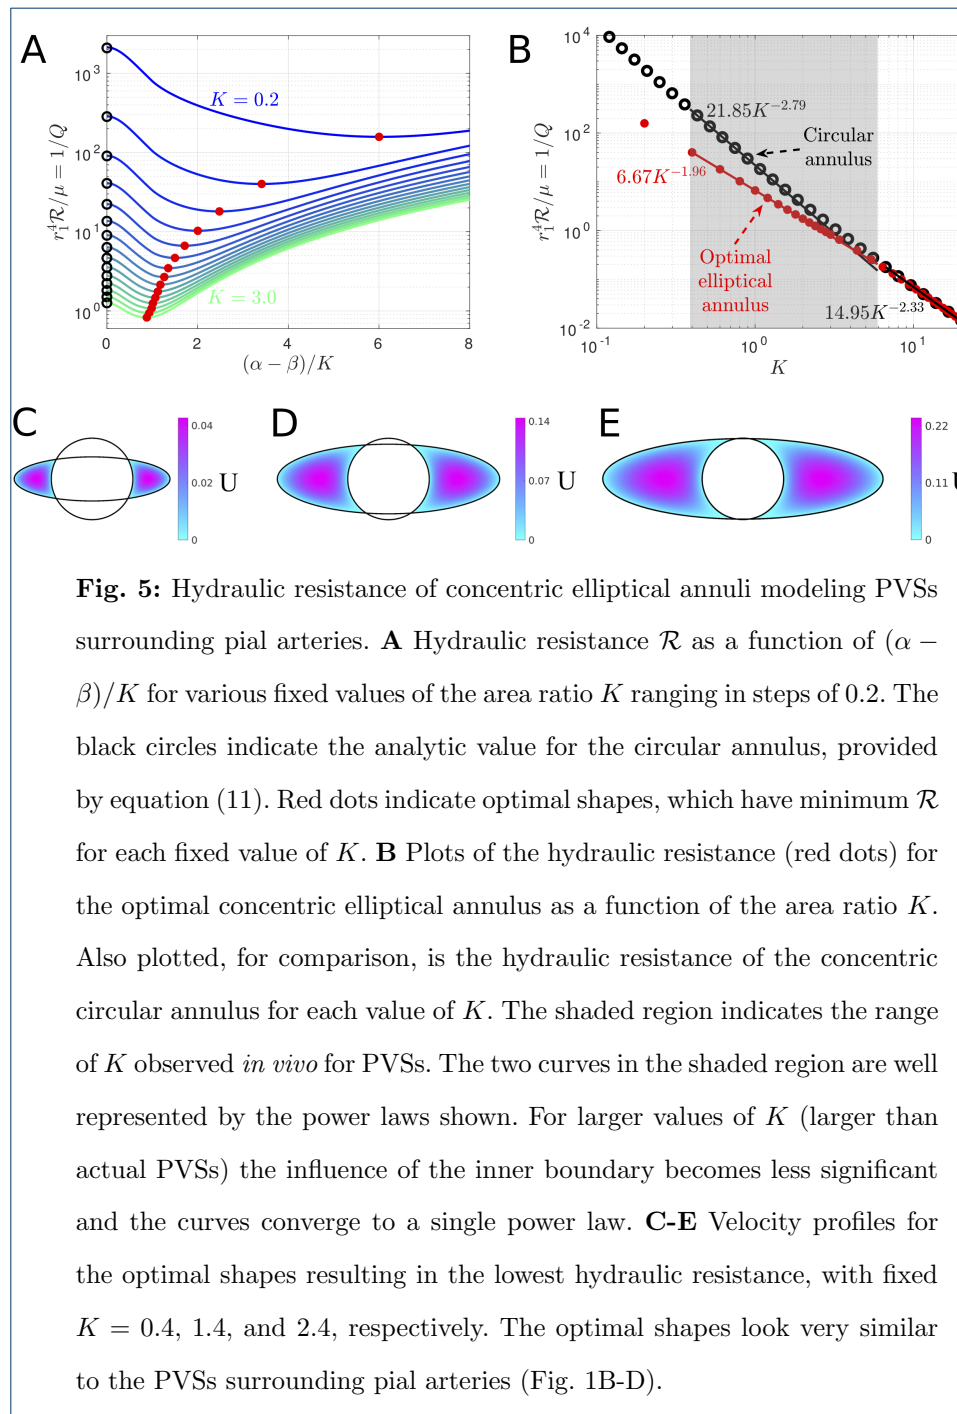



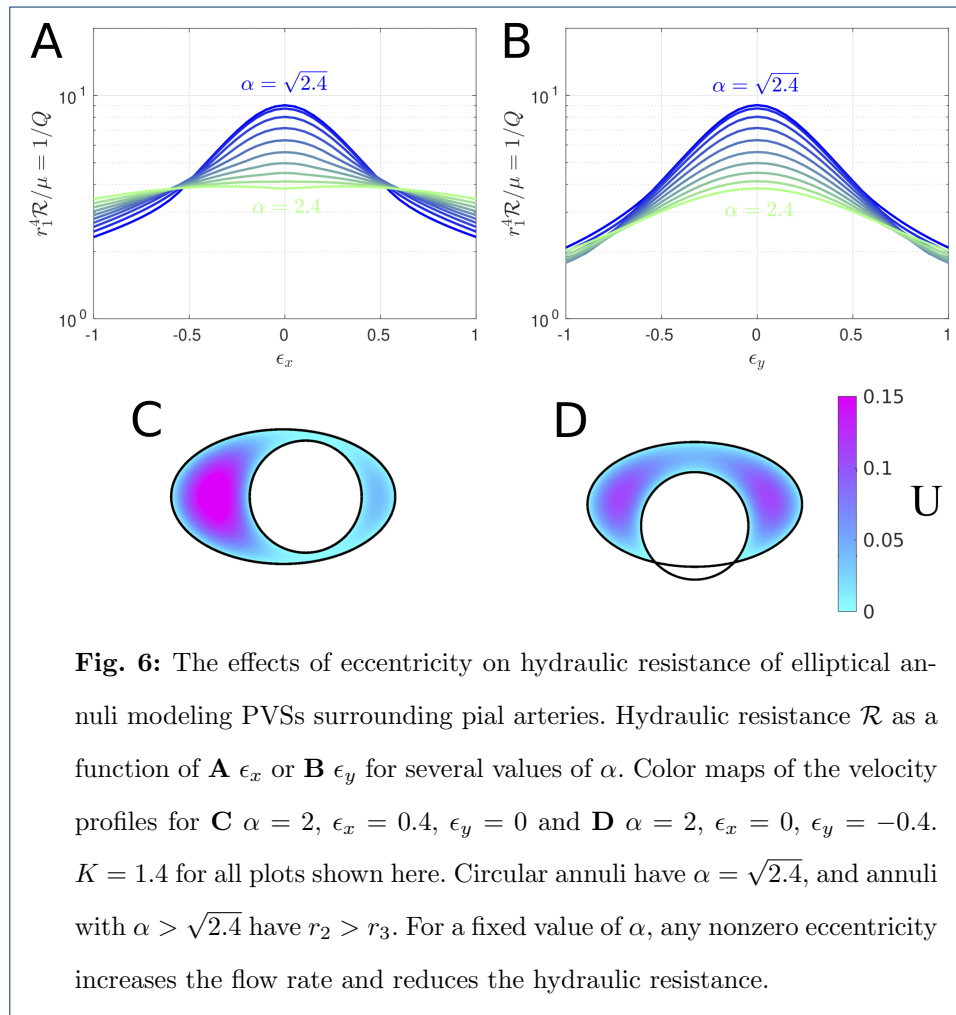

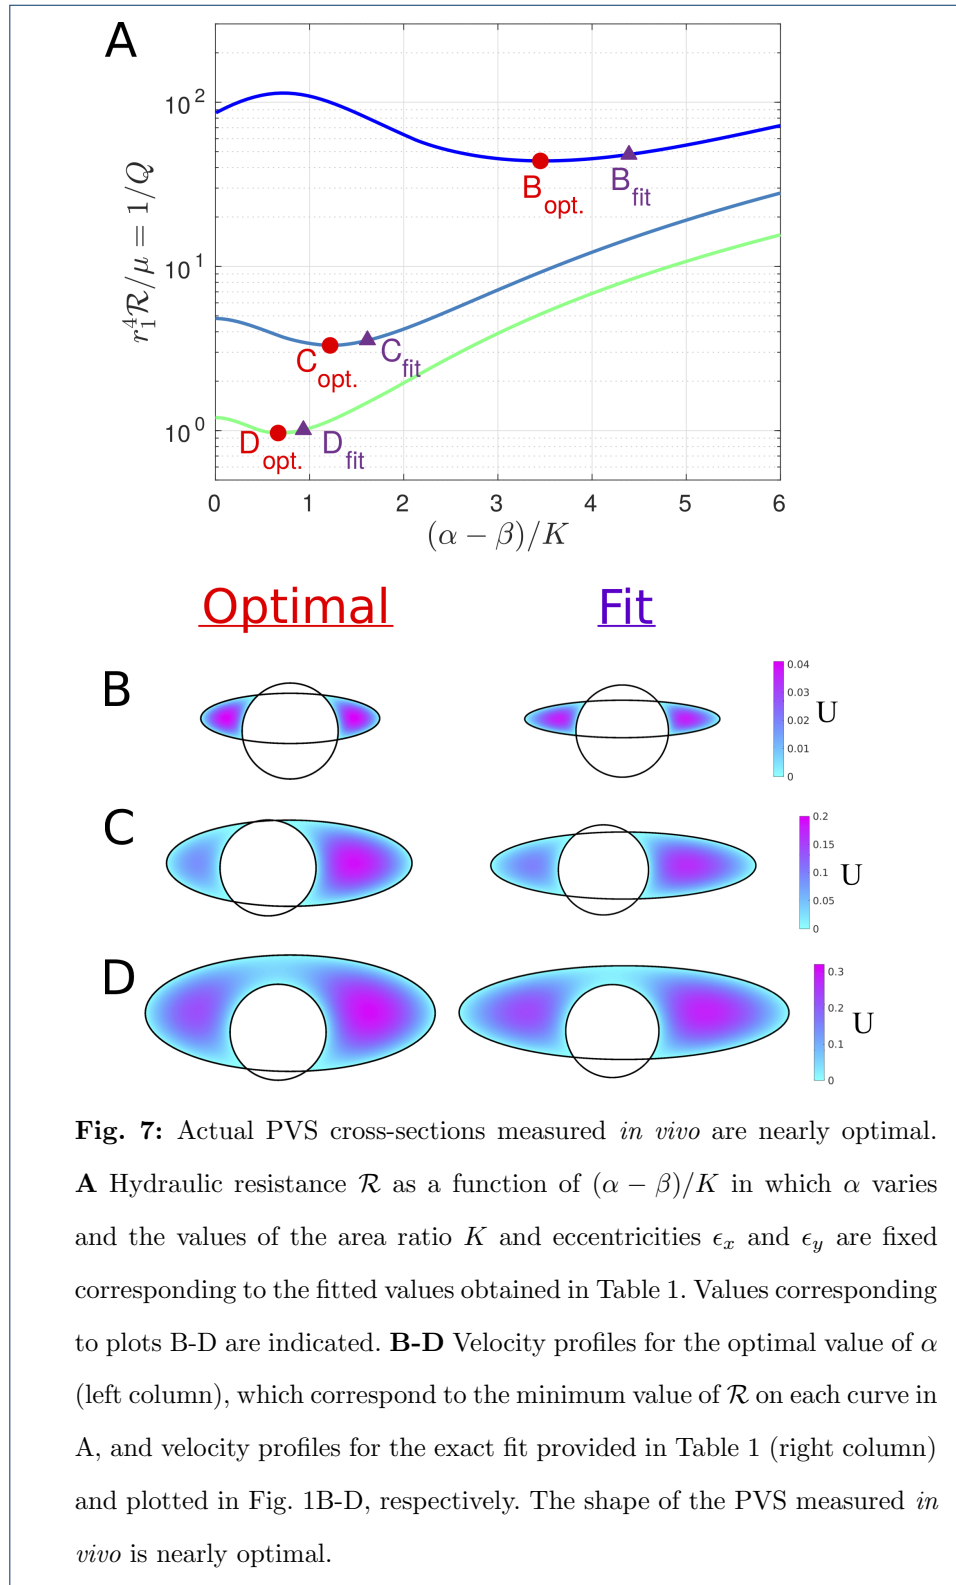

Source: http://biorxiv.org/content/10.1101/522409v2.full.pdf
